# Supplementary material
Source: Research Square preprint supplement (doi:10.21203/rs.3.rs-10356261/v1)
Supplement: Supplementary file 1 [file f6f2b9df0f061334adedb88b.docx]

**STROBE Checklist for Cohort Studies**

Manuscript: High Systemic Immune-Inflammation Index as a Predictor of In-Hospital and 30-Day Major Adverse Cardiovascular Events

| **Item** | **STROBE recommendation** | **Manuscript reporting** | **Reported on page** |
| --- | --- | --- | --- |
| 1 | Title and abstract | Indicate the study design in the title or abstract and provide an informative, balanced summary. | Title; pp. 1-2 |
| 2 | Background/rationale | Explain the scientific background and rationale. | Introduction; pp. 2-3 |
| 3 | Objectives | State specific objectives, including prespecified hypotheses. | End of Introduction; p. 3 |
| 4 | Study design | Present key elements of the study design early. | Methods - Study design and setting; p. 3 |
| 5 | Setting | Describe setting, location, and relevant dates. | Methods - Study design and setting; p. 3 |
| 6 | Participants | Give eligibility criteria, sources, and methods of selection and follow-up. | Methods - Participants; pp. 3-4 |
| 7 | Variables | Clearly define outcomes, exposures, predictors, confounders, and diagnostic criteria. | Methods - Data collection, Outcome measures, Statistical analysis; pp. 4-5 |
| 8 | Data sources/measurement | Describe sources and methods of assessment for each variable. | Methods - Data collection and inflammatory indices; p. 4 |
| 9 | Bias | Describe efforts to address potential sources of bias. | Consecutive sampling, pre-PCI sampling, standardized collection; pp. 3-4; limitations p. 11 |
| 10 | Study size | Explain how the study size was determined. | Methods - Sample size; p. 4 |
| 11 | Quantitative variables | Explain handling of quantitative variables and groupings. | Methods - Statistical analysis; pp. 4-5 |
| 12a | Statistical methods | Describe all statistical methods, including control of confounding. | Methods - Statistical analysis; p. 5 |
| 12b | Subgroups/interactions | Describe methods used for subgroup analyses. | Methods - Statistical analysis; p. 5 |
| 12c | Missing data | Explain how missing data were addressed. | Incomplete essential data were excluded; Participants; p. 4 |
| 12d | Loss to follow-up | Explain how loss to follow-up was addressed. | Thirty-day follow-up described; Methods p. 4; no separate loss count reported in source dataset |
| 12e | Sensitivity analyses | Describe any sensitivity analyses. | STEMI subgroup analysis; Methods p. 5 and Results p. 9 |
| 13a | Participants | Report numbers at each stage of the study. | 120 participants included; Results p. 6 |
| 13b | Non-participation | Give reasons for non-participation at each stage. | Eligibility exclusions described; Methods pp. 3-4 |
| 13c | Flow diagram | Consider use of a flow diagram. | Not included because staged screening counts were not available in the source thesis |
| 14a | Descriptive data | Give characteristics and potential confounders. | Table 1; pp. 6-7 |
| 14b | Missing data by variable | Indicate number with missing data for each variable. | No variable-specific missingness reported in the final analyzed cohort |
| 14c | Follow-up time | Summarize follow-up time. | 30-day follow-up and event-free survival; pp. 8-9 |
| 15 | Outcome data | Report numbers of outcome events or summary measures. | Table 3; p. 8 |
| 16a | Main results | Give unadjusted and adjusted estimates with precision and confounders. | Results pp. 7-9; Table 4 p. 9 |
| 16b | Category boundaries | Report category boundaries when continuous variables are categorized. | SII, NLR, PLR cut-offs in Table 2; p. 7 |
| 16c | Absolute risk translation | Consider translating relative risk into absolute risk. | Absolute event proportions and RR are reported; pp. 7-8 |
| 17 | Other analyses | Report subgroup and other analyses. | ROC comparison and STEMI subgroup; pp. 7 and 9 |
| 18 | Key results | Summarize key results with reference to objectives. | First paragraph of Discussion; p. 9 |
| 19 | Limitations | Discuss limitations, direction, and magnitude of potential bias. | Discussion; p. 11 |
| 20 | Interpretation | Give a cautious overall interpretation. | Discussion pp. 9-11; Conclusion p. 11 |
| 21 | Generalisability | Discuss external validity. | Discussion - limitations and clinical implications; pp. 10-11 |
| 22 | Funding | Give source of funding and role of funders. | Declarations - Funding; p. 12 |

*Note: Page numbers refer to 01_Main_Manuscript_Blinded.docx. Items not available in the source thesis are explicitly identified rather than inferred.*
